# Supplementary material
Source: publisher figshare collection journal article supplement (https://tandf.figshare.com/ndownloader/files/15191540)
Supplement: Supplementary file 1 [file 15191540]

CAPTIONS FOR SUPPLEMENTAL FIGURES

SM1. Earliest Radiocarbon Dates for Sampled Sites

SM2: Alternate Version of Figure 3, with Northern Caribbean Proxies.

The trends shown in the 18O analyses from Belize (Kennett et al 2012) and Puerto Rico (Lane et al 2009), confirm that the climatic trends in the northern Caribbean are generally aligned yet differ in substantial ways from the southern Caribbean. This is believed the result of a southward migration of the ITCZ that would have affected the northern region first, as well as typical variability within the zone itself.
